# Supplementary material for: Alanylglutamine Relieved Asthma Symptoms by Regulating Gut Microbiota and the Derived Metabolites in Mice
Source: Hindawi journal article supplement (doi:10.1155/2020/7101407), 2020-12-29

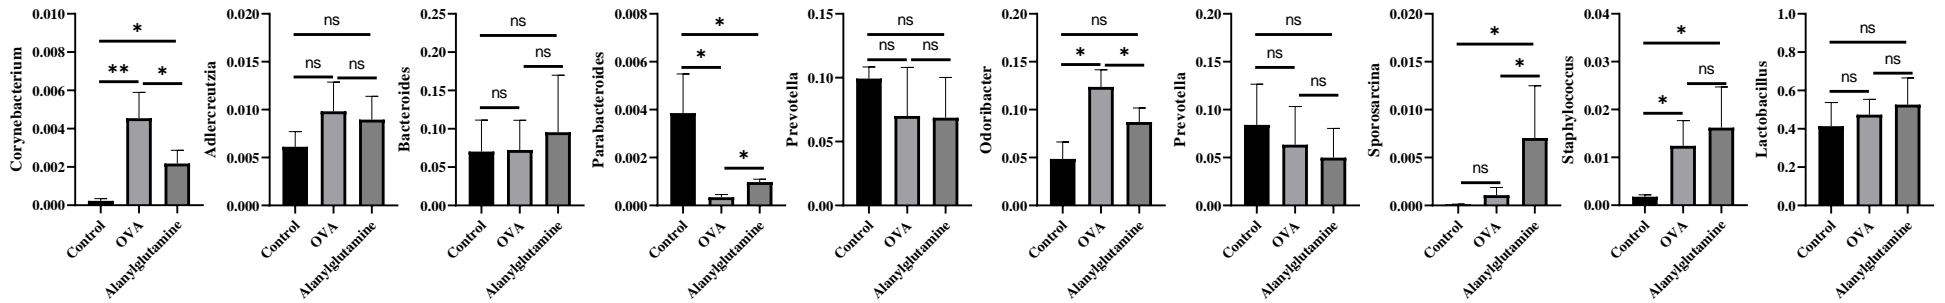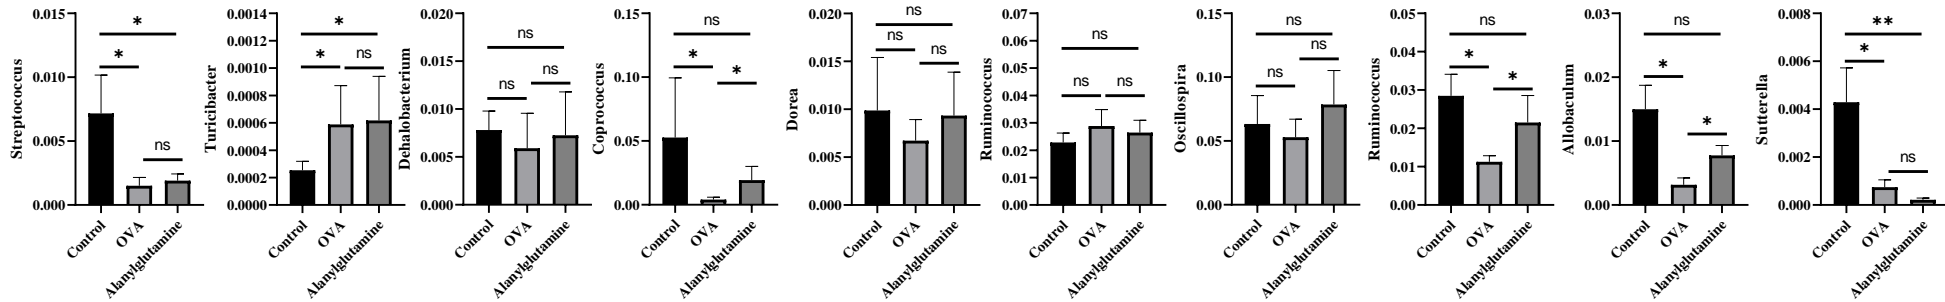

Supplement: f1 [file 7101407.f1.pdf]
